# Supplementary material
Source: publisher figshare collection journal article supplement (https://acs.figshare.com/ndownloader/files/3992365)
Supplement: Supplementary file 1 [file 3992365]

# The use of high-pressure CO<sub>2</sub> for concentrating Cr<sup>VI</sup> from electroplating wastewater by Mg-Al layered double hydroxide

Xiangying Lv,<sup>†</sup> Zhi Chen,<sup>†</sup> Yongjing Wang,<sup>†</sup> Feng Huang<sup>‡</sup> and Zhang Lin<sup>†,\*</sup>

<sup>†</sup>State Key Laboratory of Structural Chemistry, Fujian Institute of Research on the Structure of Matter, Chinese Academy of Sciences, Fuzhou, Fujian 350002, China

<sup>‡</sup>Key Laboratory of Optoelectronic Materials Chemistry and Physics, Fujian Institute of Research on the Structure of Matter, Chinese Academy of Sciences, Fuzhou, Fujian 350002, China

**CORRESPONDING AUTHOR** E-mail: zlin@fjirsm.ac.cn; Tel&Fax: (+086)591-83705474

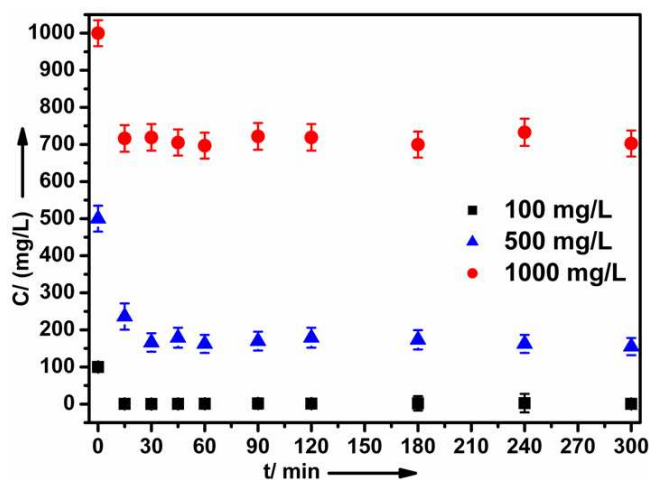

**Figure S1.** Adsorption behaviors of Cr<sup>VI</sup> with different initial concentrations (100, 500 and 1000 mg/L). Experimental conditions: LDH = 4.0 g/L, pH: 4, time: 300 min.

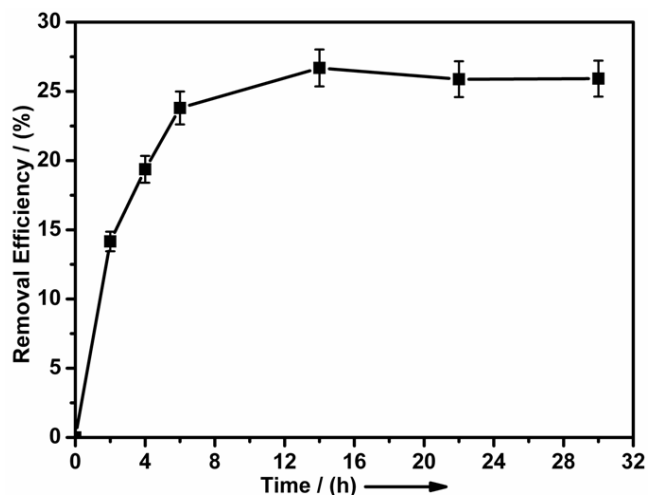

Figure S2. The effect of reaction time on the desorption efficiency.

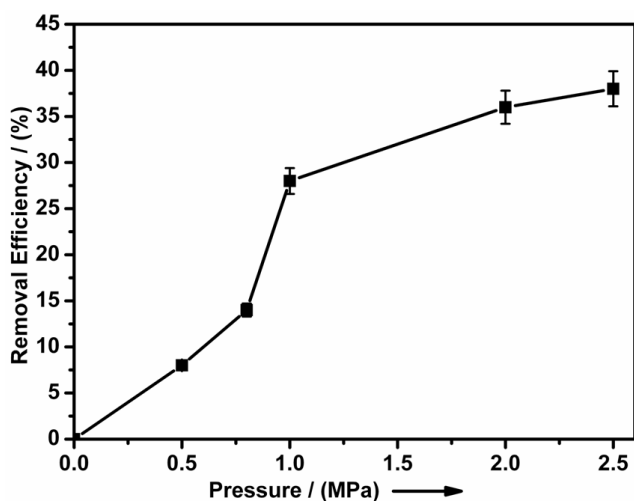

Figure S3. The effect of reaction CO<sub>2</sub> pressure on the desorption efficiency.

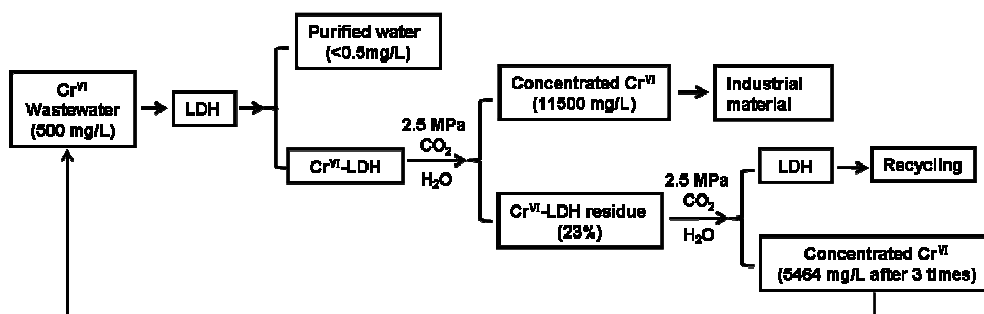

Figure S4. Summary of the Cr<sup>VI</sup> disposal system by LDH with high-pressure CO<sub>2</sub>

**Table S1.** Cr<sup>VI</sup> Desorption efficiency and the enrichment multiples after one desorption with high-pressure CO<sub>2</sub>.

| <b>batch no.</b>                              | <b>1</b> | <b>2</b> |
|-----------------------------------------------|----------|----------|
| LDH dosage (g/L)                              | 10       | 10       |
| initial Cr <sup>VI</sup> concentration (mg/L) | 500      | 500      |
| LDH adsorption quantity (mg/g)                | 73       | 12       |
| desorption ratio (%)                          | 77       | 60       |
| enriched multiples                            | 22.4     | 15       |

**Table S2.** Cr<sup>VI</sup> desorption efficiency and the enrichment multiples after desorbing the Cr<sup>VI</sup>-LDH by CO<sub>2</sub> during the treatment of electroplating wastewater.

| <b>batch no.</b>                              | <b>1</b> | <b>2</b> | <b>3</b> |
|-----------------------------------------------|----------|----------|----------|
| LDH dosage (g/L)                              | 16       | 16       | 16       |
| initial Cr <sup>VI</sup> concentration (mg/L) | 1031     | 1031     | 1031     |
| desorption ratio (%) after one cycle          | 79       | 77       | 75       |
| adsorption quantity (mg/g) after four cycles  | 64.4     | 63.8     | 64.6     |
| enriched multiples                            | 9.9      | 9.6      | 9.4      |
